# Supplementary material
Source: PubMed Central journal article supplement (PMC3154499)

## Supplementary Figure 1: Comparison of miRNA Expression to qRT-PCR

### Expression in SHC Discovery BM- and BM+ Samples.

(BM- is depicted in red color and BM+ is depicted in blue color. The panel on the left represents miRNA expression as determined by miRNA microarray profiling, while the panel on the right represents miRNA expression after qRT-PCR analysis)

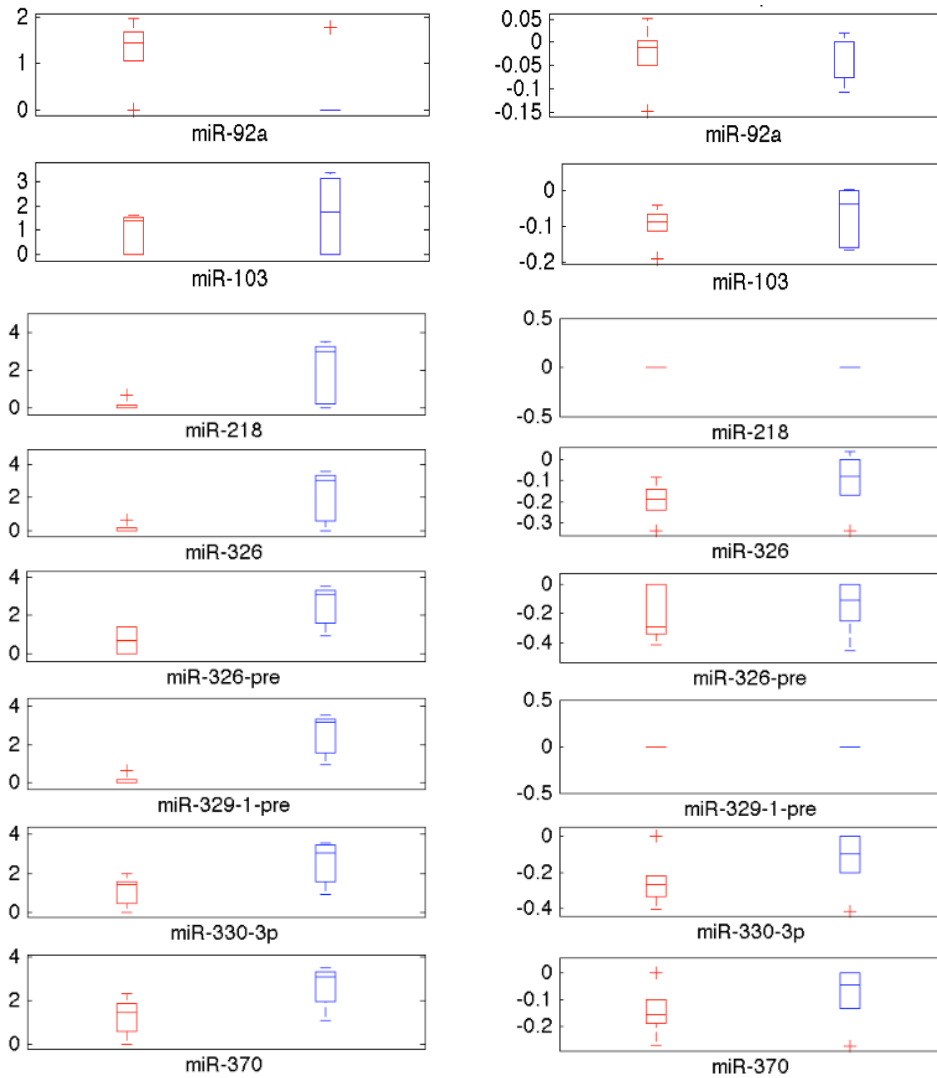

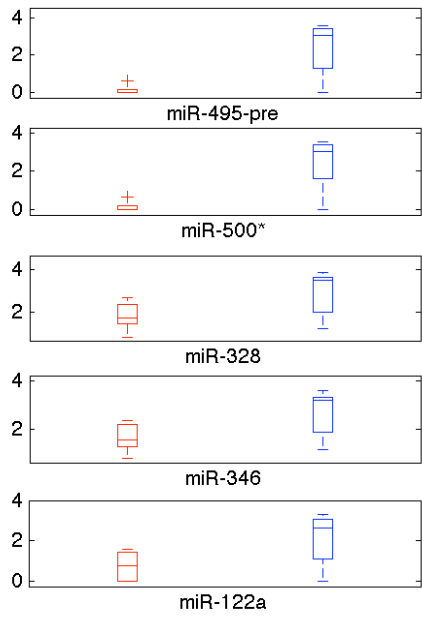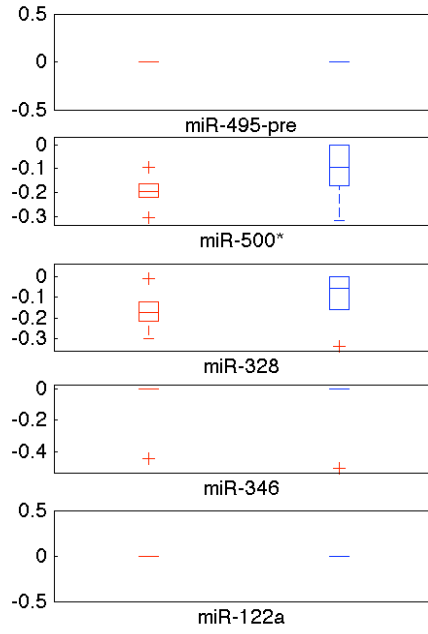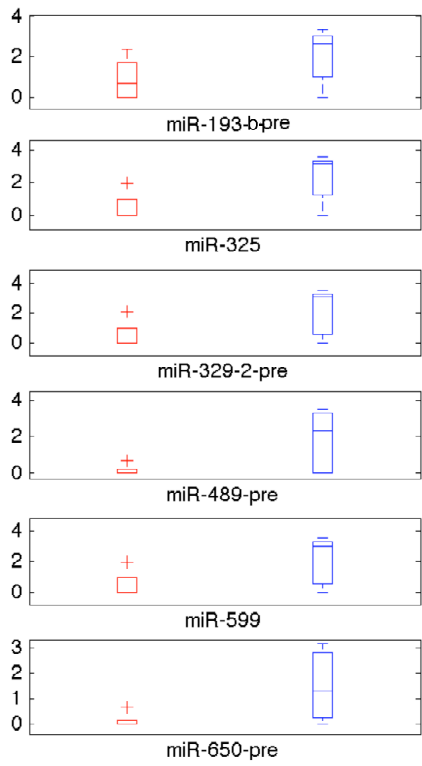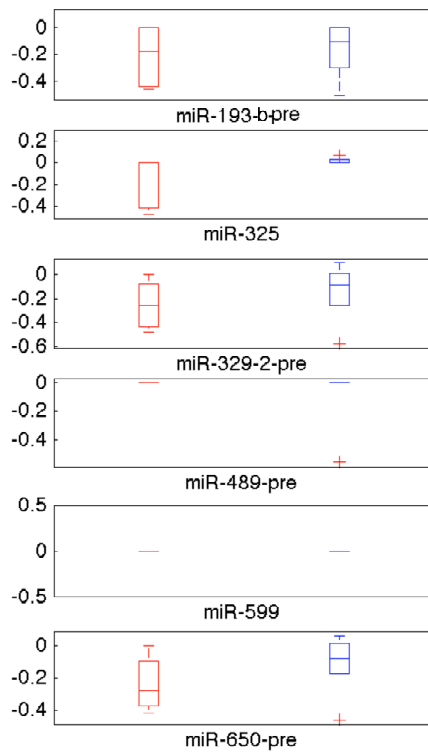

Supplement: NIHMS289178-supplement-Supplemental_Figure_1.pdf [file NIHMS289178-supplement-Supplemental_Figure_1.pdf]
