# Supplementary material
Source: PubMed Central journal article supplement (PMC3154499)

**Supplementary Figure 3:** Relative levels of expression of miR-328 in H1703 and A549 cells. RNU6 was used as the reference primer. A549 has a lower expression of miR-328 compared to H1703 cells

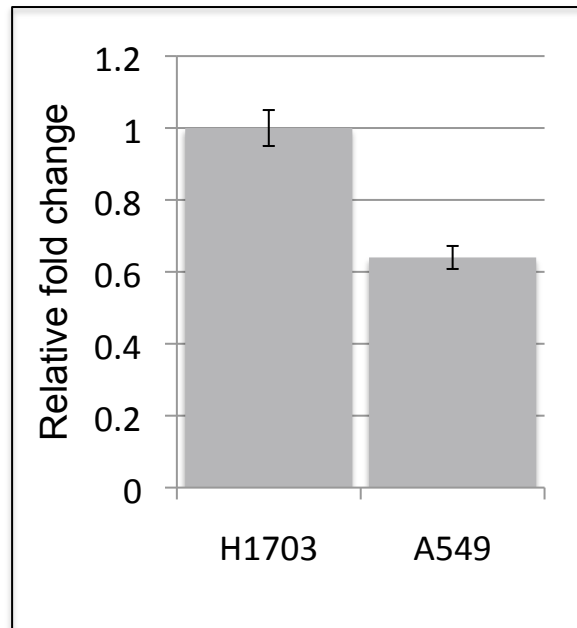

Supplement: NIHMS289178-supplement-Supplemental_Figure_3.pdf [file NIHMS289178-supplement-Supplemental_Figure_3.pdf]
