# Supplementary material
Source: PubMed Central journal article supplement (PMC3154499)
Supplement: NIHMS289178-supplement-Supplemental_Table_1.pdf [file NIHMS289178-supplement-Supplemental_Table_1.pdf]

Supplementary Table 1

| Category                        | ID     | ID  | Age | Gender | Histology               | Stage at Diagnosis | PET workup at diagnosis | MRI brain at diagnosis | No. of months between diagnosis to develop BM+ | No. of months follow-up for BM- | RNA From Thoracic Tumor Tissue | RNA From Brain Tumor Tissue |
|---------------------------------|--------|-----|-----|--------|-------------------------|--------------------|-------------------------|------------------------|------------------------------------------------|---------------------------------|--------------------------------|-----------------------------|
| Discovery SHC BM+ Cases (N=7)   | BM+1   | 4   | 53  | M      | Squamous cell carcinoma | 3A                 | y                       | y                      | 7.9                                            | N/A                             | x                              |                             |
|                                 | BM+2   | 11  | 58  | F      | Adenocarcinoma          | 3A                 | y                       | y                      | 11.2                                           | N/A                             | x                              |                             |
|                                 | BM+3   | 7   | 71  | F      | Squamous cell carcinoma | 4                  | y                       | y                      | Metastasis present at diagnosis                | N/A                             | x                              |                             |
|                                 | BM+4   | 8   | 57  | F      | Squamous cell carcinoma | 3A                 | y                       | y                      | 5.1                                            | N/A                             | x                              |                             |
|                                 | BM+5   | 10  | 68  | F      | Adenocarcinoma          | 4                  | y                       | y                      | Metastasis present at diagnosis                | N/A                             | x                              |                             |
|                                 | BM+6   | 14  | 55  | F      | Adenocarcinoma          | 4                  | y                       | y                      | Metastasis present at diagnosis                | N/A                             | x                              |                             |
|                                 | BM+7   | 12  | 64  | F      | Adenocarcinoma          | 4                  | y                       | y                      | Metastasis present at diagnosis                | N/A                             | x                              |                             |
| Discovery SHC BM- Cases (N=6)   | BM-1   | 1   | 61  | M      | Squamous cell carcinoma | 3A                 | v                       | v                      | N/A                                            | 1.3                             | x                              |                             |
|                                 | BM-2*  | 5   | 67  | F      | Squamous cell carcinoma | 4                  | v                       | v                      | N/A                                            | 16.2                            | x                              |                             |
|                                 | BM-3   | 13  | 68  | M      | Adenocarcinoma          | 4                  | v                       | v                      | N/A                                            | 48.3                            | x                              |                             |
|                                 | BM-4   | 3   | 62  | M      | Squamous cell carcinoma | 1A                 | y                       | v                      | N/A                                            | 10.2                            | x                              |                             |
|                                 | BM-5   | 2   | 60  | F      | Adenocarcinoma          | 4                  | v                       | v                      | N/A                                            | 5.9                             | x                              |                             |
|                                 | BM-6   | 6   | 65  | F      | Adenocarcinoma          | 1B                 | y                       | y                      | N/A                                            | 45.8                            | x                              |                             |
| Iowa Cases (N=24)               | IOWA1  | 219 | 69  | M      | Squamous cell carcinoma | -                  | -                       | -                      | -                                              | N/A                             |                                | x                           |
|                                 | IOWA2  | 246 | 61  | M      | NSCLC NOS               | -                  | -                       | -                      | -                                              | N/A                             |                                | x                           |
|                                 | IOWA3  | 257 | 73  | M      | Squamous cell carcinoma | -                  | -                       | -                      | -                                              | N/A                             |                                | x                           |
|                                 | IOWA4  | 268 | 76  | F      | Squamous cell carcinoma | -                  | -                       | -                      | -                                              | N/A                             |                                | x                           |
|                                 | IOWA5  | 273 | 69  | M      | Squamous cell carcinoma | -                  | -                       | -                      | -                                              | N/A                             |                                | x                           |
|                                 | IOWA6  | 275 | 58  | M      | Adenocarcinoma          | -                  | -                       | -                      | -                                              | N/A                             |                                | x                           |
|                                 | IOWA7  | 301 | 77  | M      | NSCLC NOS               | -                  | -                       | -                      | -                                              | N/A                             |                                | x                           |
|                                 | IOWA8  | 321 | 65  | M      | NSCLC NOS               | -                  | -                       | -                      | -                                              | N/A                             |                                | x                           |
|                                 | IOWA9  | 326 | 48  | F      | Adenocarcinoma          | -                  | -                       | -                      | -                                              | N/A                             |                                | x                           |
|                                 | IOWA10 | 431 | 62  | F      | Adenocarcinoma          | -                  | -                       | -                      | -                                              | N/A                             |                                | x                           |
|                                 | IOWA11 | 467 | 53  | F      | Adenocarcinoma          | -                  | -                       | -                      | -                                              | N/A                             |                                | x                           |
|                                 | IOWA12 | 468 | 49  | M      | Adenocarcinoma          | -                  | -                       | -                      | -                                              | N/A                             |                                | x                           |
|                                 | IOWA13 | 469 | 38  | M      | NSCLC NOS               | -                  | -                       | -                      | -                                              | N/A                             |                                | x                           |
|                                 | IOWA14 | 479 | 58  | M      | Adenocarcinoma          | -                  | -                       | -                      | -                                              | N/A                             |                                | x                           |
|                                 | IOWA15 | 504 | 65  | F      | Adenocarcinoma          | -                  | -                       | -                      | -                                              | N/A                             |                                | x                           |
|                                 | IOWA16 | 586 | 63  | F      | Adenocarcinoma          | -                  | -                       | -                      | -                                              | N/A                             |                                | x                           |
|                                 | IOWA17 | 594 | 64  | F      | Adenocarcinoma          | -                  | -                       | -                      | -                                              | N/A                             |                                | x                           |
|                                 | IOWA18 | 648 | 56  | F      | Adenocarcinoma          | -                  | -                       | -                      | -                                              | N/A                             |                                | x                           |
|                                 | IOWA19 | 652 | 60  | M      | NSCLC NOS               | -                  | -                       | -                      | -                                              | N/A                             |                                | x                           |
|                                 | IOWA20 | 675 | 58  | F      | Adenocarcinoma          | -                  | -                       | -                      | -                                              | N/A                             |                                | x                           |
|                                 | IOWA21 | 721 | 63  | M      | Squamous cell carcinoma | -                  | -                       | -                      | -                                              | N/A                             |                                | x                           |
|                                 | IOWA22 | 725 | 54  | M      | Adenocarcinoma          | -                  | -                       | -                      | -                                              | N/A                             |                                | x                           |
|                                 | IOWA23 | 739 | 58  | F      | Adenocarcinoma          | -                  | -                       | -                      | -                                              | N/A                             |                                | x                           |
|                                 | IOWA24 | 740 | 47  | F      | Adenocarcinoma          | -                  | -                       | -                      | -                                              | N/A                             |                                | x                           |
| Validation SHC BM+ Cases (N=4)  | SHC1+  | 573 | 70  | M      | Squamous cell carcinoma | 2B                 | y                       | y                      | 3.9                                            | N/A                             | x                              |                             |
|                                 | SHC2+  | 273 | 53  | F      | Adenocarcinoma          | 1B                 | y                       | CT brain               | 9.6                                            | N/A                             | x                              |                             |
|                                 | SHC3+  | 986 | 59  | F      | Adenocarcinoma          | 2A                 | y                       | -                      | 6.5                                            | N/A                             | x                              |                             |
|                                 | SHC4+  | 214 | 52  | F      | Adenocarcinoma          | 1A                 | y                       | -                      | 47.8                                           | N/A                             | x                              |                             |
| Validation SHC BM- Cases (N=11) | SHC5-  | 517 | 67  | M      | Squamous cell carcinoma | 2B                 | y                       | y                      | N/A                                            | 28.5                            | x                              |                             |
|                                 | SHC6-  | 466 | 61  | M      | Adenocarcinoma          | 1A                 | y                       | N/A                    | N/A                                            | 68.6                            | x                              |                             |
|                                 | SHC7-  | 54  | 65  | F      | Large cell carcinoma    | 1A                 | y                       | N/A                    | N/A                                            | 31.7                            | x                              |                             |
|                                 | SHC8-  | 383 | 64  | F      | Large cell carcinoma    | 1B                 | y                       | -                      | N/A                                            | 32.2                            | x                              |                             |
|                                 | SHC9-  | 494 | 74  | M      | Large cell carcinoma    | 1B                 | -                       | -                      | N/A                                            | 73.7                            | x                              |                             |
|                                 | SHC10- | 719 | 78  | F      | Adenocarcinoma          | 1A                 | -                       | CT CAP                 | N/A                                            | 96.1                            | x                              |                             |
|                                 | SHC11- | 505 | 46  | F      | Adenocarcinoma          | 1B                 | y                       | CT brain               | N/A                                            | 41.7                            | x                              |                             |
|                                 | SHC12- | 739 | 76  | M      | Adenocarcinoma          | 1A                 | CT CAP                  | CT brain               | N/A                                            | 94.3                            | x                              |                             |
|                                 | SHC13- | 679 | 66  | F      | Adenocarcinoma          | 2A                 | y                       | y                      | N/A                                            | 43.5                            | x                              |                             |
|                                 | SHC14- | 144 | 53  | F      | Adenocarcinoma          | 1A                 | y                       | y                      | N/A                                            | 53.6                            | x                              |                             |
|                                 | SHC15- | 349 | 73  | F      | Squamous cell carcinoma | 1B                 | y                       | y                      | N/A                                            | 58.6                            | x                              |                             |

KEY: M: Male F:Female NOS: not otherwise specified  
 N/A: not applicable -: not available NSCLC: non-small cell lung cancer  
 x: RNA analyzed y: performed  
 CT CAP: CT of the chest, abdomen, and pelvis
