# Supplementary material
Source: PubMed Central journal article supplement (PMC3154499)
Supplement: NIHMS289178-supplement-Supplemental_Table_2.pdf [file NIHMS289178-supplement-Supplemental_Table_2.pdf]

| ProbeNames   | Gene Names   | Pvalues (Storey FDR) | Fold Change  | Dir(M vs. C) | 'A549_C1' | 'A549_C2' | 'A549_M1' | 'A549_M2' |
|--------------|--------------|----------------------|--------------|--------------|-----------|-----------|-----------|-----------|
| A_23_P19313  | TBP          | 0.000506675          | 3.009554806  | Up           | 0         | 0         | 0.4799    | 0.4771    |
| A_23_P82868  | PLAT         | 0.000659927          | 3.82259869   | Up           | 0         | 0         | 0.5796    | 0.5851    |
| A_23_P53614  | BRAP         | 0.000948686          | -2.107672568 | Down         | 0.7221    | 0.7267    | 0.4022    | 0.399     |
| A_32_P4403   | C16orf72     | 0.000948686          | 2.3464487    | Up           | 0         | 0         | 0.3673    | 0.3735    |
| A_23_P134314 | C7orf11      | 0.000948686          | 2.098225198  | Up           | -0.5907   | -0.5943   | -0.2729   | -0.2684   |
| A_23_P151018 | LEMD3        | 0.001111496          | 3.327722899  | Up           | 0         | 0         | 0.5157    | 0.5285    |
| A_24_P471242 | NA           | 0.001111496          | 3.332258837  | Up           | 0         | 0         | 0.5285    | 0.5169    |
| A_24_P48723  | PTGIS        | 0.001111496          | 2.148146741  | Up           | -0.6036   | -0.6014   | -0.2741   | -0.2668   |
| A_24_P25687  | NA           | 0.001313342          | 3.129841423  | Up           | -1.102    | -1.0943   | -0.6085   | -0.5968   |
| A_23_P17065  | CCL20        | 0.001872241          | 2.176413152  | Up           | -0.6039   | -0.6033   | -0.2599   | -0.2719   |
| A_24_P184844 | CHD2         | 0.001969222          | -2.326713298 | Down         | -0.9129   | -0.9265   | -1.2894   | -1.2834   |
| A_24_P912021 | NA           | 0.001969222          | 2.947916391  | Up           | -0.0206   | -0.0049   | 0.4512    | 0.4624    |
| A_24_P181677 | PQLC1        | 0.001969222          | -2.682554166 | Down         | 0.4377    | 0.4192    | 0         | 0         |
| A_24_P247153 | RPS25        | 0.001969222          | -2.278526868 | Down         | -1.0275   | -1.013    | -1.3755   | -1.3802   |
| A_32_P201754 | NA           | 0.001997841          | 3.164973344  | Up           | -1.1719   | -1.15     | -0.6631   | -0.6578   |
| A_32_P60635  | LOC643037    | 0.002096591          | 2.16757273   | Up           | 0         | 0         | 0.3439    | 0.3279    |
| A_32_P203500 | PCMTD1       | 0.002368522          | -2.043263928 | Down         | 0         | 0         | -0.3023   | -0.3185   |
| A_32_P16816  | NA           | 0.002434926          | 4.322594328  | Up           | 0         | 0         | 0.6527    | 0.6181    |
| A_32_P157945 | DSP          | 0.002619878          | 2.941226243  | Up           | -0.7012   | -0.7175   | -0.2525   | -0.2293   |
| A_24_P144770 | NA           | 0.002619878          | -2.112737612 | Down         | -0.2999   | -0.3186   | -0.6361   | -0.6319   |
| A_32_P68773  | NA           | 0.002619878          | 3.643173435  | Up           | -0.236    | -0.255    | 0.3016    | 0.3301    |
| A_23_P84974  | NA           | 0.002619929          | 3.976620965  | Up           | -0.4571   | -0.4289   | 0.1695    | 0.1436    |
| A_23_P123454 | NUDT18       | 0.002619929          | -3.100431578 | Down         | -0.1193   | -0.1501   | -0.6267   | -0.625    |
| A_23_P327462 | RFX6         | 0.003010279          | -2.191607239 | Down         | -0.3699   | -0.3937   | -0.7229   | -0.7219   |
| A_23_P148422 | PCYT1B       | 0.003053599          | 2.104890377  | Up           | -0.5719   | -0.5938   | -0.2556   | -0.2634   |
| A_23_P24269  | C10orf88     | 0.003124315          | 2.074586694  | Up           | -0.5671   | -0.5914   | -0.261    | -0.2633   |
| A_32_P29551  | NA           | 0.003124315          | -4.009598578 | Down         | 1.6336    | 1.6763    | 1.0603    | 1.0443    |
| A_23_P367816 | SNX29        | 0.003124315          | 9.21014058   | Up           | -0.1235   | -0.0624   | 0.8524    | 0.8915    |
| A_23_P254801 | PLCG1        | 0.003127091          | 2.069947116  | Up           | 0.1132    | 0.0935    | 0.4115    | 0.4272    |
| A_24_P382253 | RPRD1A       | 0.003127091          | 2.223594384  | Up           | -0.6      | -0.6191   | -0.2723   | -0.2527   |
| A_32_P176594 | KIAA1614     | 0.003467153          | 3.40302037   | Up           | -0.4968   | -0.5189   | 0.0446    | 0.0027    |
| A_24_P324141 | MUC5AC       | 0.003467153          | -2.45224934  | Down         | 0.9287    | 0.893     | 0.5203    | 0.523     |
| A_24_P16361  | NA           | 0.003467153          | -2.118814917 | Down         | -0.7903   | -0.7913   | -1.1321   | -1.1022   |
| A_24_P28295  | RABGAP1L     | 0.003467153          | -2.894177909 | Down         | -0.2648   | -0.252    | -0.7406   | -0.7001   |
| A_23_P131771 | TPD52L2      | 0.003467153          | 2.176215238  | Up           | -0.5601   | -0.5789   | -0.2203   | -0.2434   |
| A_32_P109922 | ZFAT         | 0.003467153          | 7.785111032  | Up           | -0.3551   | -0.3762   | 0.4863    | 0.5619    |
| A_23_P64044  | FERMT3       | 0.003603761          | 3.18630917   | Up           | -0.0195   | 0.0093    | 0.5183    | 0.4776    |
| A_23_P214766 | HIVEP2       | 0.003603761          | -3.338544865 | Down         | 1.4279    | 1.381     | 0.8937    | 0.869     |
| A_32_P146777 | NA           | 0.003603761          | -4.737241141 | Down         | 1.0246    | 0.9567    | 0.3168    | 0.3161    |
| A_32_P82701  | NA           | 0.003603761          | -2.400899892 | Down         | -0.3354   | -0.3275   | -0.7307   | -0.6937   |
| A_32_P106553 | NA           | 0.003603761          | 2.697016296  | Up           | -0.3155   | -0.2963   | 0.1063    | 0.1431    |
| A_23_P51718  | PABPC4       | 0.003603761          | 2.746414261  | Up           | -0.1454   | -0.1075   | 0.3232    | 0.302     |
| A_24_P350557 | NA           | 0.00361041           | 2.078831114  | Up           | 1.3663    | 1.3576    | 1.6954    | 1.6636    |
| A_24_P267748 | NDOR1        | 0.00361041           | 2.317876378  | Up           | -0.0918   | -0.1296   | 0.2559    | 0.2537    |
| A_23_P8339   | MRPL18       | 0.003637385          | -2.305465587 | Down         | 1.0365    | 1.0144    | 0.6469    | 0.6782    |
| A_32_P42725  | NA           | 0.003637385          | -4.502913914 | Down         | -0.3341   | -0.3206   | -0.9472   | -1.0172   |
| A_32_P22364  | NA           | 0.003637385          | 3.804493616  | Up           | -0.0388   | 0.0212    | 0.5809    | 0.564     |
| A_23_P404064 | VEZF1        | 0.003637385          | -2.165831762 | Down         | 0.6526    | 0.6864    | 0.3273    | 0.341     |
| A_32_P235358 | LOC100130476 | 0.003654941          | 2.839659638  | Up           | 0         | 0         | 0.4276    | 0.4775    |
| A_23_P211850 | ABHD6        | 0.003692897          | 2.237510392  | Up           | -0.597    | -0.6275   | -0.275    | -0.2498   |
| A_23_P164650 | APOE         | 0.003692897          | 2.640579564  | Up           | -0.5164   | -0.5445   | -0.1282   | -0.0897   |
| A_23_P126135 | MFN2         | 0.003720953          | 2.130967563  | Up           | -0.5427   | -0.5721   | -0.2164   | -0.2411   |
| A_24_P872359 | NA           | 0.003720953          | -3.450313955 | Down         | -0.976    | -1.0317   | -1.5268   | -1.5553   |
| A_24_P358302 | NA           | 0.003720953          | -2.687207158 | Down         | -0.4545   | -0.4629   | -0.8637   | -0.9137   |
| A_24_P114334 | RMND5A       | 0.003720953          | 2.108576554  | Up           | -0.5342   | -0.5645   | -0.2137   | -0.2368   |
| A_23_P65963  | BFAR         | 0.003728838          | -2.82680325  | Down         | 0.0359    | -0.0024   | -0.4538   | -0.4153   |
| A_23_P125423 | C1R          | 0.003728838          | -2.6328539   | Down         | 0.2856    | 0.2397    | -0.1679   | -0.1467   |
| A_24_P915784 | LOC151162    | 0.003728838          | -2.218845661 | Down         | 0.0772    | 0.0357    | -0.2852   | -0.2932   |
| A_23_P60387  | NOTCH1       | 0.003728838          | 3.126433386  | Up           | 0         | 0         | 0.4638    | 0.5242    |
| A_23_P215419 | ICA1         | 0.003734433          | -4.955873977 | Down         | -0.2634   | -0.2457   | -0.9083   | -0.9952   |
| A_23_P147431 | LYN          | 0.003734433          | 2.266172576  | Up           | 0         | 0         | 0.3774    | 0.332     |
| A_24_P110618 | NA           | 0.003734433          | 3.339410378  | Up           | 0.4346    | 0.4585    | 0.9386    | 1         |
| A_32_P76122  | NA           | 0.003734433          | 4.952621643  | Up           | 0         | 0         | 0.6496    | 0.7358    |

|              |              |             |              |      |         |         |         |         |
|--------------|--------------|-------------|--------------|------|---------|---------|---------|---------|
| A_24_P200583 | UBE2B        | 0.003734433 | 2.174083634  | Up   | 0.4831  | 0.5207  | 0.8287  | 0.8502  |
| A_32_P182156 | ZNF511       | 0.003734433 | -2.110075063 | Down | 0.3446  | 0.303   | 0       | 0       |
| A_23_P96872  | HSPB11       | 0.003952964 | 5.167476815  | Up   | -0.4727 | -0.3916 | 0.3081  | 0.2564  |
| A_24_P753302 | LOC730227    | 0.003952964 | 2.149983724  | Up   | 0       | 0       | 0.3544  | 0.3093  |
| A_24_P400702 | NA           | 0.003952964 | 2.126119349  | Up   | -0.5738 | -0.6039 | -0.2774 | -0.2452 |
| A_23_P105900 | NA           | 0.003952964 | 2.456580523  | Up   | 0.5806  | 0.5281  | 0.95    | 0.9409  |
| A_23_P8625   | LRRC4        | 0.003988244 | 4.208186791  | Up   | -0.8662 | -0.7793 | -0.2001 | -0.1929 |
| A_32_P83520  | NA           | 0.003988244 | 2.244079817  | Up   | -0.8262 | -0.8679 | -0.4829 | -0.5085 |
| A_32_P125568 | NA           | 0.003988244 | 2.560310659  | Up   | -0.0024 | 0       | 0.3775  | 0.4348  |
| A_32_P120534 | NA           | 0.003988244 | 3.029521806  | Up   | -0.1648 | -0.2147 | 0.3144  | 0.2691  |
| A_23_P363831 | FBXO3        | 0.00402922  | 3.297681437  | Up   | -2.232  | -2.197  | -1.7296 | -1.6647 |
| A_24_P388190 | KCNK3        | 0.00402922  | 3.026148051  | Up   | -0.8179 | -0.829  | -0.3778 | -0.3099 |
| A_23_P47527  | C11orf10     | 0.004061748 | -2.29118743  | Down | 0.2753  | 0.2445  | -0.0793 | -0.1215 |
| A_23_P17837  | APOL1        | 0.004122149 | 2.409485774  | Up   | -0.0032 | -0.024  | 0.394   | 0.3413  |
| A_24_P85117  | ARHGAP8      | 0.004122149 | 2.371022952  | Up   | -1.3421 | -1.3875 | -1.0065 | -0.9727 |
| A_23_P132669 | GLT8D1       | 0.004122149 | -3.818161099 | Down | 0.0141  | 0.0996  | -0.5293 | -0.5166 |
| A_32_P235159 | MSL3L2       | 0.004122149 | 2.505846281  | Up   | -0.5389 | -0.5928 | -0.1791 | -0.1534 |
| A_24_P127051 | NA           | 0.004122149 | -2.338978035 | Down | 0.2494  | 0.2633  | -0.0866 | -0.1403 |
| A_24_P307195 | AASDH        | 0.004196853 | 4.602376964  | Up   | -0.628  | -0.5264 | 0.0724  | 0.1045  |
| A_23_P49610  | C17orf91     | 0.004196853 | -2.135268715 | Down | -0.0694 | -0.0913 | -0.3868 | -0.4338 |
| A_24_P381901 | CX3CL1       | 0.004196853 | 3.257292034  | Up   | -0.1652 | -0.0955 | 0.4062  | 0.3604  |
| A_32_P119007 | ESPL1        | 0.004196853 | -4.939833729 | Down | 0.3337  | 0.3339  | -0.3076 | -0.4194 |
| A_23_P208422 | F2RL3        | 0.004196853 | -2.749377546 | Down | -0.1981 | -0.2251 | -0.6186 | -0.6852 |
| A_24_P136522 | GARNL3       | 0.004196853 | 3.300326373  | Up   | -0.0324 | -0.0507 | 0.5154  | 0.4351  |
| A_23_P500010 | KLK12        | 0.004196853 | 2.212321182  | Up   | -0.0807 | -0.027  | 0.2967  | 0.2869  |
| A_24_P230514 | LOC100130924 | 0.004196853 | 2.943304808  | Up   | 0.017   | 0.0582  | 0.4753  | 0.5364  |
| A_32_P69333  | NA           | 0.004196853 | 2.554694168  | Up   | 0       | 0       | 0.4383  | 0.374   |
| A_24_P703830 | NANOS3       | 0.004196853 | -2.364726739 | Down | -0.31   | -0.2501 | -0.6537 | -0.6519 |
| A_32_P100974 | RPL24        | 0.004196853 | 2.724303338  | Up   | -0.5404 | -0.5605 | -0.0825 | -0.1503 |
| A_24_P247055 | TAF1C        | 0.004196853 | -5.157904982 | Down | 0.7657  | 0.6518  | 0       | 0       |
| A_23_P352266 | BCL2         | 0.004250447 | 2.2795503    | Up   | 0       | 0       | 0.387   | 0.3266  |
| A_23_P2181   | CYB5R2       | 0.004250447 | 5.28687499   | Up   | 0       | 0       | 0.6581  | 0.7798  |
| A_23_P33558  | hCG_1732469  | 0.004250447 | 3.840791147  | Up   | -1.4389 | -1.5314 | -0.8817 | -0.9155 |
| A_23_P73198  | NA           | 0.004250447 | -17.70387937 | Down | 2.053   | 2.2316  | 0.846   | 0.954   |
| A_32_P8971   | NA           | 0.004250447 | 2.583100177  | Up   | -0.5255 | -0.5278 | -0.1507 | -0.0811 |
| A_23_P72668  | SDPR         | 0.004250447 | 2.164940518  | Up   | -0.5449 | -0.5908 | -0.2159 | -0.2483 |
| A_24_P687326 | C9orf109     | 0.004256365 | -9.727597862 | Down | 1.1086  | 1.0259  | 0       | 0.1496  |
| A_24_P119405 | LOC100130713 | 0.004256365 | 2.358734968  | Up   | -0.1979 | -0.2606 | 0.1373  | 0.1517  |
| A_23_P145053 | TUBE1        | 0.004256365 | -2.271097675 | Down | -0.1113 | -0.1142 | -0.5005 | -0.4396 |
| A_24_P220822 | C4orf37      | 0.0042918   | -2.744767776 | Down | -0.3539 | -0.3945 | -0.846  | -0.7809 |
| A_24_P10890  | PRR5         | 0.0042918   | 3.095357989  | Up   | 0.0201  | 0.0977  | 0.5325  | 0.5694  |
| A_24_P927786 | NA           | 0.004503172 | 2.423947094  | Up   | -0.6641 | -0.5948 | -0.2454 | -0.2417 |
| A_24_P193570 | CNOT1        | 0.00450633  | 3.169062834  | Up   | 0       | 0.0023  | 0.5448  | 0.4547  |
| A_32_P187951 | BTNL9        | 0.004553807 | -2.052246012 | Down | -0.1669 | -0.2063 | -0.5201 | -0.4777 |
| A_24_P301837 | HRH3         | 0.004553807 | -2.014677701 | Down | -0.6585 | -0.7007 | -0.9649 | -1.0025 |
| A_23_P11859  | HSD17B7      | 0.004553807 | -3.29649059  | Down | 0.4257  | 0.354   | -0.0953 | -0.1606 |
| A_32_P6575   | NA           | 0.004553807 | 5.72709159   | Up   | -0.4758 | -0.4724 | 0.3478  | 0.2088  |
| A_32_P37592  | SCARNA17     | 0.004553807 | 2.018310725  | Up   | 0.4838  | 0.4299  | 0.7706  | 0.7546  |
| A_24_P252020 | TRIM41       | 0.004553807 | 2.226413542  | Up   | -1.2678 | -1.2805 | -0.896  | -0.9593 |
| A_32_P206293 | ZNF322A      | 0.004553807 | -2.001817081 | Down | 0.853   | 0.908   | 0.5736  | 0.5862  |
| A_23_P16817  | CLK1         | 0.004665305 | -2.761004984 | Down | 2.0595  | 2.1414  | 1.671   | 1.6514  |
| A_23_P200425 | S100BPB      | 0.004665305 | 2.394618576  | Up   | -0.4098 | -0.4521 | -0.0227 | -0.0817 |
| A_23_P122531 | C6orf48      | 0.004675251 | -3.569879196 | Down | -0.8583 | -0.7529 | -1.3638 | -1.3465 |
| A_32_P99648  | EIF4E3       | 0.004675251 | 7.303548661  | Up   | 0.0027  | 0.0622  | 0.9675  | 0.8128  |
| A_24_P838483 | LOC338809    | 0.004675251 | 2.203654578  | Up   | -0.8107 | -0.8499 | -0.5145 | -0.4606 |
| A_24_P936327 | NA           | 0.004747865 | 15.37873697  | Up   | -0.1198 | 0       | 1.0204  | 1.2193  |
| A_24_P100627 | ATRNL1       | 0.004757999 | -2.522425696 | Down | 1.7165  | 1.6391  | 1.2642  | 1.2908  |
| A_23_P207400 | BRCA1        | 0.004757999 | 2.075336584  | Up   | -0.5241 | -0.5804 | -0.2184 | -0.2507 |
| A_24_P295999 | CD4          | 0.004757999 | 2.929231003  | Up   | -0.2467 | -0.2    | 0.2017  | 0.2826  |
| A_24_P289366 | LASS6        | 0.004757999 | 2.07374753   | Up   | -0.5162 | -0.5708 | -0.2097 | -0.2427 |
| A_32_P99032  | NA           | 0.004757999 | -2.928673504 | Down | -0.9693 | -1.0473 | -1.5    | -1.448  |
| A_32_P152544 | NA           | 0.004757999 | -2.579309318 | Down | 0.0306  | 0.0041  | -0.3557 | -0.4359 |
| A_23_P55099  | PRKCA        | 0.004757999 | 2.490942743  | Up   | 0.522   | 0.5993  | 0.946   | 0.9711  |
| A_23_P7066   | RPL9         | 0.004757999 | -2.827855477 | Down | 1.46    | 1.4968  | 0.9844  | 1.0664  |
| A_23_P119634 | UPK1A        | 0.004757999 | 2.820250785  | Up   | -0.061  | 0.027   | 0.4453  | 0.4255  |

|              |              |             |              |      |         |         |         |         |
|--------------|--------------|-------------|--------------|------|---------|---------|---------|---------|
| A_23_P56339  | GPSN2        | 0.004867865 | -3.65764389  | Down | 0.6176  | 0.501   | 0       | 0       |
| A_32_P103558 | NA           | 0.004867865 | -3.54160353  | Down | 1.8276  | 1.7407  | 1.2725  | 1.1986  |
| A_24_P349869 | NA           | 0.004998469 | 2.036757566  | Up   | -0.0796 | -0.1422 | 0.2091  | 0.189   |
| A_24_P323421 | NA           | 0.005065992 | -2.126526982 | Down | 0.2911  | 0.3614  | 0       | 0       |
| A_23_P129433 | SLC9A5       | 0.005065992 | 2.096138151  | Up   | -0.5199 | -0.5854 | -0.2186 | -0.2417 |
| A_24_P151148 | ZNF235       | 0.005065992 | -2.027777244 | Down | 0.9222  | 0.9311  | 0.6514  | 0.5854  |
| A_32_P190367 | NA           | 0.005079507 | -2.7731935   | Down | -0.264  | -0.3407 | -0.7735 | -0.7157 |
| A_23_P27180  | CCDC55       | 0.005088636 | 2.991537081  | Up   | -0.2368 | -0.1345 | 0.3045  | 0.2817  |
| A_24_P118142 | NA           | 0.005088636 | -2.126658928 | Down | 0.8694  | 0.9234  | 0.5925  | 0.5453  |
| A_24_P85169  | BTBD9        | 0.005092973 | -2.740748946 | Down | 0.4834  | 0.387   | 0       | 0       |
| A_24_P931583 | NA           | 0.005092973 | 2.04302863   | Up   | -0.514  | -0.5712 | -0.2128 | -0.2508 |
| A_23_P59338  | PDE7B        | 0.005092973 | -3.073719551 | Down | 0.7387  | 0.7063  | 0.1802  | 0.2839  |
| A_23_P21425  | GPR119       | 0.005184761 | -2.348883503 | Down | 0.2891  | 0.218   | -0.0947 | -0.1381 |
| A_23_P386442 | KIAA0087     | 0.005184761 | 8.146679807  | Up   | -0.3621 | -0.205  | 0.5635  | 0.6955  |
| A_24_P724153 | LOC100131699 | 0.005292842 | -2.369423661 | Down | -0.7854 | -0.8701 | -1.2044 | -1.1963 |
| A_23_P45180  | GYP A        | 0.00530976  | 2.265396243  | Up   | 0.1089  | 0.0272  | 0.4284  | 0.4218  |
| A_24_P920081 | NA           | 0.00530976  | -3.383008752 | Down | 0.4829  | 0.4627  | 0       | -0.1212 |
| A_23_P57733  | DRD3         | 0.005401463 | -3.15614035  | Down | -0.3124 | -0.1971 | -0.7573 | -0.743  |
| A_23_P391506 | IVNS1ABP     | 0.005401463 | -2.642361396 | Down | 0.4685  | 0.3699  | 0       | 0       |
| A_23_P19369  | LRRC16A      | 0.005401463 | -2.852984465 | Down | 0.4119  | 0.3926  | -0.109  | -0.0033 |
| A_32_P199529 | NA           | 0.005401463 | -2.022459475 | Down | -0.2603 | -0.3258 | -0.6128 | -0.5831 |
| A_32_P69492  | POLH         | 0.005401463 | -5.822018955 | Down | 1.2517  | 1.1319  | 0.3576  | 0.4935  |
| A_24_P136683 | CASBL        | 0.005591641 | 4.152956103  | Up   | 0       | 0       | 0.686   | 0.5382  |
| A_24_P926624 | NA           | 0.005616945 | 2.727578535  | Up   | -0.2512 | -0.2559 | 0.1264  | 0.2317  |
| A_23_P160466 | SLC19A2      | 0.005616945 | 2.433398921  | Up   | 0       | -0.0635 | 0.3888  | 0.3197  |
| A_32_P83174  | NA           | 0.005665217 | 2.172557699  | Up   | -0.8697 | -0.9391 | -0.5896 | -0.5437 |
| A_24_P298723 | TTY20        | 0.005665217 | -2.961949611 | Down | -0.6128 | -0.581  | -1.1279 | -1.0157 |
| A_23_P158041 | AQP7         | 0.005726444 | 3.761673272  | Up   | -0.6596 | -0.7705 | -0.1854 | -0.0919 |
| A_23_P208706 | BAX          | 0.005726444 | 4.871225404  | Up   | -0.5048 | -0.6567 | 0.1541  | 0.0687  |
| A_24_P900730 | NA           | 0.005726444 | -2.982583741 | Down | 0.6261  | 0.6042  | 0.0777  | 0.1957  |
| A_23_P161644 | RBM14        | 0.005726444 | 5.521793542  | Up   | -0.0111 | -0.1989 | 0.6539  | 0.6403  |
| A_23_P349203 | RNH1         | 0.005726444 | 2.582471296  | Up   | 0       | 0.02    | 0.4695  | 0.369   |
| A_23_P325737 | CCDC60       | 0.005803758 | 3.239953974  | Up   | -0.0143 | 0.1074  | 0.5851  | 0.5362  |
| A_24_P59430  | FAM55B       | 0.005803758 | 2.842516888  | Up   | -1.4302 | -1.514  | -1.058  | -0.9784 |
| A_23_P314876 | C10orf82     | 0.005844068 | 2.990101015  | Up   | -0.1534 | -0.2714 | 0.2487  | 0.2851  |
| A_23_P161125 | MOV10        | 0.005844068 | -2.601660933 | Down | 0.5582  | 0.4565  | 0.0795  | 0.1101  |
| A_23_P332937 | C19orf23     | 0.005881911 | 2.334433779  | Up   | 0       | 0       | 0.3182  | 0.413   |
| A_23_P117546 | SOS2         | 0.005882098 | -4.673569942 | Down | 0.5457  | 0.6801  | 0       | -0.1101 |
| A_23_P155796 | GNRHR        | 0.005959404 | -3.092143227 | Down | 0.5127  | 0.432   | -0.0693 | 0.0314  |
| A_23_P28688  | CPSF3        | 0.006013678 | -2.383633491 | Down | 0.0946  | -0.0038 | -0.3231 | -0.3351 |
| A_24_P63799  | NA           | 0.006065919 | -2.36888038  | Down | 0.4689  | 0.3885  | 0.0253  | 0.0847  |
| A_23_P71989  | UPP1         | 0.006065919 | 2.39731464   | Up   | -0.8254 | -0.8337 | -0.5029 | -0.4025 |
| A_23_P109034 | SDC4         | 0.006072268 | 2.871885733  | Up   | -0.4226 | -0.4354 | 0.0856  | -0.0356 |
| A_23_P423315 | RBM17        | 0.006079148 | 3.112642657  | Up   | 0.0141  | -0.0851 | 0.4139  | 0.5025  |
| A_32_P137812 | NA           | 0.006117247 | 2.217188203  | Up   | -0.3751 | -0.4626 | -0.0887 | -0.0537 |
| A_23_P418493 | ATPAF2       | 0.006183306 | 2.740808903  | Up   | -0.5587 | -0.5395 | -0.1736 | -0.0565 |
| A_24_P387609 | ISCA1        | 0.006191936 | -4.977383322 | Down | 0.8154  | 0.6429  | -0.0002 | 0.078   |
| A_24_P486924 | NA           | 0.00624546  | 2.084199529  | Up   | 0.3049  | 0.363   | 0.6857  | 0.6195  |
| A_32_P26017  | NA           | 0.006279165 | -2.594496877 | Down | -1.0439 | -1.0897 | -1.5367 | -1.4303 |
| A_24_P739075 | NA           | 0.006290281 | -2.783956257 | Down | -0.4414 | -0.3849 | -0.8048 | -0.9161 |
| A_24_P219140 | YY1          | 0.006307154 | 3.403856792  | Up   | -0.599  | -0.4588 | 0.0351  | -0.0194 |
| A_23_P145197 | BYSL         | 0.006351754 | 2.252581     | Up   | -0.5788 | -0.4791 | -0.1649 | -0.1821 |
| A_24_P941006 | C2orf19      | 0.006351754 | 3.97913713   | Up   | -1.2512 | -1.0934 | -0.5317 | -0.6019 |
| A_24_P385739 | EIF5A2       | 0.006351754 | 2.330304965  | Up   | -0.3804 | -0.452  | -0.0107 | -0.0873 |
| A_24_P942017 | hCG_2039148  | 0.006351754 | 3.299286321  | Up   | 0.0692  | -0.0813 | 0.5164  | 0.5213  |
| A_23_P342585 | NA           | 0.006351754 | -2.016286673 | Down | -0.8445 | -0.7604 | -1.0967 | -1.1134 |
| A_32_P60709  | NA           | 0.006351754 | 6.265246971  | Up   | -0.1806 | -0.2385 | 0.6834  | 0.4665  |
| A_23_P60899  | TGS1         | 0.006351754 | 2.024007875  | Up   | -0.774  | -0.8613 | -0.5106 | -0.5079 |
| A_24_P80571  | NA           | 0.006371177 | 3.563625522  | Up   | 0       | 0       | 0.6235  | 0.4661  |
| A_23_P24192  | RRP12        | 0.006371177 | -10.30289569 | Down | 0.2424  | 0.1522  | -0.9782 | -0.6941 |
| A_23_P79518  | IL1B         | 0.0063831   | 2.322536339  | Up   | 0       | 0       | 0.416   | 0.3094  |
| A_24_P306968 | LOC100131310 | 0.0063831   | 3.178304405  | Up   | -0.7839 | -0.8906 | -0.3865 | -0.2832 |
| A_24_P332441 | NA           | 0.0063831   | -2.185537256 | Down | 0.3903  | 0.3031  | 0.0329  | -0.0156 |
| A_32_P30717  | NA           | 0.0063831   | 2.098266956  | Up   | -0.0374 | -0.0033 | 0.2554  | 0.3438  |
| A_23_P79134  | PLEKHF1      | 0.0063831   | 2.482085977  | Up   | 0       | 0       | 0.3342  | 0.448   |

|              |           |             |              |      |         |         |         |         |
|--------------|-----------|-------------|--------------|------|---------|---------|---------|---------|
| A_23_P87238  | SAA4      | 0.0063831   | 3.62313584   | Up   | -0.7005 | -0.6389 | -0.1905 | -0.0413 |
| A_23_P345220 | SH3PXD2A  | 0.0063831   | 2.049069348  | Up   | -0.3914 | -0.4211 | -0.1394 | -0.0537 |
| A_23_P77545  | SSTR5     | 0.0063831   | 2.748350766  | Up   | 0       | 0       | 0.3698  | 0.4988  |
| A_23_P82002  | TEAD3     | 0.0063831   | 2.22181989   | Up   | -0.3775 | -0.3952 | -0.0922 | 0.0074  |
| A_23_P319013 | ZNF383    | 0.0063831   | -2.379159199 | Down | -0.5818 | -0.6758 | -1.0334 | -0.974  |
| A_24_P195327 | NA        | 0.006398637 | 2.805068488  | Up   | 0.0039  | 0.0243  | 0.3918  | 0.5227  |
| A_24_P398130 | USP6NL    | 0.006398637 | 2.910407315  | Up   | -0.2213 | -0.2408 | 0.16    | 0.2955  |
| A_23_P84952  | TFE3      | 0.006403793 | 3.675268414  | Up   | -0.6096 | -0.4381 | 0.0564  | 0.0432  |
| A_23_P150609 | IGF2      | 0.006514243 | 2.217831675  | Up   | -0.7399 | -0.8399 | -0.424  | -0.4589 |
| A_24_P596027 | LOC440104 | 0.006514243 | -2.339123541 | Down | -0.539  | -0.5787 | -0.9839 | -0.8775 |
| A_23_P50131  | NA        | 0.006514243 | -2.306014479 | Down | 1.0444  | 1.0547  | 0.6274  | 0.7389  |
| A_24_P929888 | NA        | 0.006514243 | 2.209186869  | Up   | -0.2344 | -0.2202 | 0.0625  | 0.1654  |
| A_23_P110846 | CNOT8     | 0.00658472  | 2.511522154  | Up   | -1.8028 | -1.9231 | -1.475  | -1.4433 |
| A_24_P362805 | GK5       | 0.006615521 | -2.177421974 | Down | -0.5778 | -0.6688 | -0.9849 | -0.9343 |
| A_32_P181222 | KCNMA1    | 0.006681602 | 3.501213875  | Up   | -1.0279 | -0.8972 | -0.3623 | -0.4714 |
| A_23_P31443  | ERVWE1    | 0.006697478 | 2.371615909  | Up   | -0.2335 | -0.2171 | 0.2037  | 0.0883  |
| A_23_P333683 | IGSF10    | 0.006697478 | 2.424627945  | Up   | 1.1654  | 1.2699  | 1.635   | 1.5737  |
| A_23_P207537 | DUSP14    | 0.006726235 | -4.505646732 | Down | 0.6817  | 0.5062  | -0.1088 | 0       |
| A_24_P829209 | LOC285944 | 0.006726235 | -2.385810748 | Down | 0.4329  | 0.3143  | 0       | 0       |
| A_24_P388502 | MTMR14    | 0.006726235 | 2.196713023  | Up   | -0.7847 | -0.8941 | -0.4914 | -0.497  |
| A_23_P412392 | SEC22B    | 0.006726235 | 4.294267203  | Up   | -0.4285 | -0.5452 | 0.0612  | 0.2236  |
| A_23_P53015  | TUT1      | 0.006726235 | 2.680353995  | Up   | -0.5722 | -0.6932 | -0.1693 | -0.2337 |
| A_23_P423012 | DUSP27    | 0.00677597  | -6.051635286 | Down | -0.2667 | -0.3936 | -1.0107 | -1.232  |
| A_23_P152218 | E2F4      | 0.00677597  | -4.047272738 | Down | 0.2161  | 0.0769  | -0.3922 | -0.5287 |
| A_23_P71821  | PBX3      | 0.00677597  | 2.266257099  | Up   | -0.142  | -0.0313 | 0.255   | 0.2887  |
| A_24_P121631 | ZNF764    | 0.00677597  | 2.203913104  | Up   | -0.0693 | 0       | 0.2648  | 0.3508  |
| A_23_P152995 | SLC6A4    | 0.006870975 | 4.037211111  | Up   | -0.0934 | 0.1001  | 0.646   | 0.5926  |
| A_23_P48029  | CLEC4A    | 0.006887119 | -3.92630176  | Down | 0.5108  | 0.6962  | 0.0422  | -0.0048 |
| A_23_P10385  | DTL       | 0.006903469 | -2.131589953 | Down | 0.9038  | 0.8316  | 0.5792  | 0.498   |
| A_24_P588897 | NA        | 0.006903469 | 3.024167307  | Up   | 0.1495  | -0.0118 | 0.5581  | 0.5557  |
| A_23_P18656  | SCLT1     | 0.006903469 | -2.971834365 | Down | -0.8882 | -1.0356 | -1.4056 | -1.4531 |
| A_24_P211884 | TMPRSS12  | 0.006903469 | 2.210146879  | Up   | -0.0473 | -0.0019 | 0.369   | 0.2657  |
| A_24_P260440 | TNPO1     | 0.006903469 | -2.644271931 | Down | 0.3303  | 0.4613  | 0       | -0.0443 |
| A_23_P54064  | METTL3    | 0.007014738 | -2.695779841 | Down | -0.8142 | -0.8941 | -1.3477 | -1.2267 |
| A_23_P256965 | C8orf12   | 0.007016425 | 2.439999639  | Up   | -0.1739 | -0.0598 | 0.2404  | 0.3057  |
| A_23_P23765  | ITGB3BP   | 0.007016425 | 2.35442821   | Up   | -0.5229 | -0.4178 | -0.131  | -0.0623 |
| A_32_P135634 | NA        | 0.007016425 | -2.217414967 | Down | -0.9828 | -0.8888 | -1.2463 | -1.3146 |
| A_23_P386450 | POLK      | 0.0070422   | 2.14373958   | Up   | 0.2541  | 0.3285  | 0.6639  | 0.5802  |
| A_24_P367481 | CCR3      | 0.007073921 | -2.359626232 | Down | -0.9841 | -1.0098 | -1.3109 | -1.4375 |
| A_23_P115407 | GSTM1     | 0.007073921 | 2.688977865  | Up   | -0.8912 | -0.7592 | -0.4253 | -0.3585 |
| A_23_P48550  | KIAA0284  | 0.007073921 | 3.515883109  | Up   | 0.1519  | 0       | 0.5704  | 0.6799  |
| A_24_P649426 | NA        | 0.007073921 | 3.586120846  | Up   | -0.4938 | -0.6173 | -0.0742 | 0.0693  |
| A_23_P342053 | RBBP6     | 0.007099548 | 2.205906952  | Up   | -0.0942 | 0       | 0.2616  | 0.3335  |
| A_24_P283635 | ADAMTSL1  | 0.007107743 | 2.217386499  | Up   | -0.7379 | -0.8432 | -0.4724 | -0.4127 |
| A_24_P13790  | CES2      | 0.007107743 | -2.437669093 | Down | 0.1184  | 0.0022  | -0.3563 | -0.2917 |
| A_23_P115407 | GSTM1     | 0.007107743 | -2.953283285 | Down | 0.1001  | -0.0285 | -0.4823 | -0.3829 |
| A_32_P117590 | NA        | 0.007107743 | -2.702567859 | Down | -0.3828 | -0.263  | -0.7975 | -0.7082 |
| A_24_P736006 | NA        | 0.007107743 | 2.065996724  | Up   | -0.5628 | -0.6648 | -0.276  | -0.3163 |
| A_32_P153361 | NA        | 0.007123063 | -2.192410989 | Down | -0.062  | -0.0396 | -0.3364 | -0.4548 |
| A_23_P75889  | PSMD13    | 0.007123063 | -2.028874919 | Down | 0.34    | 0.2381  | 0       | -0.031  |
| A_24_P359050 | NA        | 0.007150779 | -2.041673242 | Down | -0.096  | -0.0841 | -0.4583 | -0.3486 |
| A_24_P196351 | PLXNC1    | 0.007150779 | -2.931431232 | Down | 0.4225  | 0.367   | 0       | -0.157  |
| A_23_P157022 | ZNF786    | 0.007150779 | -3.123640795 | Down | 0.572   | 0.4005  | 0       | 0       |
| A_23_P57927  | HYAL2     | 0.007211107 | -2.51416849  | Down | 0.4785  | 0.3439  | 0.0373  | -0.0064 |
| A_24_P409933 | NA        | 0.007211107 | -2.119623343 | Down | 1.1108  | 1       | 0.7489  | 0.7158  |
| A_24_P922314 | NA        | 0.007211107 | 2.748338522  | Up   | 0.0941  | -0.0588 | 0.4407  | 0.485   |
| A_23_P343719 | PLCB3     | 0.007211107 | -6.469205197 | Down | 0.8036  | 0.5618  | -0.0424 | -0.1938 |
| A_24_P414803 | PLN       | 0.007211107 | -2.270708848 | Down | 0.4418  | 0.4006  | 0.0002  | 0.1223  |
| A_23_P434548 | NA        | 0.007219273 | -7.597248307 | Down | 0.0384  | 0.2233  | -0.629  | -0.8896 |
| A_24_P336577 | C1orf183  | 0.007222998 | 2.344557423  | Up   | -1.8567 | -1.9926 | -1.5514 | -1.5472 |
| A_23_P45185  | FIGF      | 0.007222998 | 2.356498555  | Up   | 0       | -0.0728 | 0.277   | 0.3904  |
| A_24_P68908  | LOC344887 | 0.007222998 | 3.487213232  | Up   | -0.042  | -0.1424 | 0.3611  | 0.5291  |
| A_32_P78623  | LOC401098 | 0.007222998 | -2.324769335 | Down | 0.8636  | 0.7771  | 0.4023  | 0.504   |
| A_24_P632835 | NA        | 0.007222998 | 2.674151944  | Up   | -0.5493 | -0.6556 | -0.231  | -0.1201 |
| A_24_P341078 | NA        | 0.007222998 | 6.561817737  | Up   | -0.1877 | -0.3945 | 0.6307  | 0.4203  |

|              |               |             |              |      |         |         |         |         |
|--------------|---------------|-------------|--------------|------|---------|---------|---------|---------|
| A_23_P144054 | PRKCD         | 0.007222998 | 2.244547476  | Up   | -0.1491 | -0.269  | 0.1227  | 0.1685  |
| A_23_P83436  | PEPD          | 0.007244839 | -3.215981379 | Down | 0.5171  | 0.3752  | 0       | -0.1189 |
| A_23_P301372 | TAPT1         | 0.007244839 | -2.104958646 | Down | 0.3486  | 0.258   | -0.0573 | 0.0188  |
| A_23_P70219  | TLX3          | 0.007244839 | -2.402747168 | Down | 0.3716  | 0.378   | -0.0592 | -0.0825 |
| A_23_P70991  | JTV1          | 0.007247096 | -2.356420482 | Down | -0.711  | -0.5777 | -1.0246 | -0.9988 |
| A_32_P34941  | NA            | 0.007247096 | 3.783608719  | Up   | -0.4094 | -0.6108 | 0.1184  | 0.0365  |
| A_24_P12181  | UBTD2         | 0.007247096 | 2.334334551  | Up   | 0       | 0       | 0.2959  | 0.4301  |
| A_24_P941487 | ZNF761        | 0.007247096 | -2.433773524 | Down | 0.3282  | 0.388   | -0.0974 | 0.0333  |
| A_32_P136427 | NA            | 0.007316945 | -2.964411092 | Down | -0.7719 | -0.8779 | -1.3701 | -1.2286 |
| A_24_P336551 | BGLAP         | 0.00733857  | 2.941189324  | Up   | -0.2423 | -0.2014 | 0.1552  | 0.323   |
| A_32_P165363 | NA            | 0.00733857  | 2.016217531  | Up   | -0.5232 | -0.4297 | -0.1377 | -0.2036 |
| A_23_P106204 | GSTZ1         | 0.007360511 | -3.427470486 | Down | 0.1294  | 0.1834  | -0.29   | -0.4878 |
| A_23_P258340 | PPIA          | 0.007400699 | 2.217505722  | Up   | -0.0962 | 0.0228  | 0.3407  | 0.2839  |
| A_24_P934528 | BTN2A1        | 0.007407556 | -2.822124627 | Down | 0.5185  | 0.481   | 0.1274  | -0.0453 |
| A_32_P226786 | FAM126B       | 0.007407556 | 2.053375722  | Up   | 0       | 0       | 0.2497  | 0.3673  |
| A_23_P82674  | GBAS          | 0.007407556 | 2.40459266   | Up   | -0.6728 | -0.5549 | -0.2751 | -0.187  |
| A_24_P349782 | MGC21881      | 0.007407556 | -3.262485904 | Down | 0.3644  | 0.1765  | -0.2581 | -0.2093 |
| A_24_P324084 | NA            | 0.007407556 | 2.6400058    | Up   | 0.1556  | 0       | 0.5309  | 0.4803  |
| A_24_P147111 | NUBPL         | 0.007407556 | 3.330731614  | Up   | -0.3739 | -0.5768 | 0.0416  | 0.0756  |
| A_23_P42241  | OR5V1         | 0.007407556 | 2.030919173  | Up   | -0.9039 | -0.7854 | -0.5409 | -0.5251 |
| A_23_P377267 | RABGAP1L      | 0.007407556 | 2.02033588   | Up   | -0.7379 | -0.6315 | -0.4009 | -0.3525 |
| A_23_P202245 | RET           | 0.007407556 | -4.28017626  | Down | -0.9572 | -1.134  | -1.758  | -1.5937 |
| A_23_P429082 | SPTY2D1       | 0.007407556 | -2.211333018 | Down | -0.6133 | -0.5174 | -0.8646 | -0.9548 |
| A_23_P94754  | TNFSF15       | 0.007456243 | 3.096899417  | Up   | 0       | 0.1494  | 0.5084  | 0.6275  |
| A_24_P915355 | ZNF445        | 0.007634888 | 2.400046574  | Up   | -0.3905 | -0.2495 | 0.0376  | 0.0925  |
| A_23_P111737 | RAMP3         | 0.007653014 | 2.438472103  | Up   | -0.7837 | -0.7958 | -0.4838 | -0.3342 |
| A_24_P255100 | C9orf135      | 0.007675442 | 2.313458979  | Up   | 0       | 0       | 0.4294  | 0.2876  |
| A_23_P216200 | AGPAT5        | 0.007701235 | -2.285254976 | Down | -0.6313 | -0.6112 | -0.9133 | -1.059  |
| A_23_P37441  | B2M           | 0.007701235 | -2.263125405 | Down | 0.0929  | -0.0078 | -0.3648 | -0.26   |
| A_23_P95683  | CA5A          | 0.007701235 | 3.653782453  | Up   | -0.4446 | -0.3685 | 0.2512  | 0.0388  |
| A_23_P433079 | DNAJC14       | 0.007701235 | -2.041143111 | Down | -0.0943 | -0.0745 | -0.3367 | -0.4604 |
| A_24_P226332 | EHPA7         | 0.007701235 | 2.737690468  | Up   | -0.5617 | -0.3845 | -0.0062 | -0.0483 |
| A_23_P39171  | GALP          | 0.007701235 | -2.331531531 | Down | -0.4577 | -0.5166 | -0.7908 | -0.9275 |
| A_24_P918907 | LOC154761     | 0.007701235 | 2.301041468  | Up   | -0.8955 | -1.0325 | -0.5703 | -0.6248 |
| A_32_P128741 | LOC723809     | 0.007701235 | 2.902057184  | Up   | -0.5301 | -0.3399 | 0.0324  | 0.0436  |
| A_23_P58993  | MOCS1         | 0.007701235 | 3.137130135  | Up   | -0.5253 | -0.4378 | -0.0828 | 0.0984  |
| A_32_P11216  | NA            | 0.007701235 | -3.217135173 | Down | 0.3945  | 0.5743  | -0.0642 | 0.0313  |
| A_23_P80200  | NA            | 0.007701235 | 2.160482469  | Up   | -0.6698 | -0.8077 | -0.3998 | -0.3977 |
| A_24_P936252 | NA            | 0.007701235 | 2.537400563  | Up   | -0.6548 | -0.7714 | -0.3686 | -0.2492 |
| A_32_P114235 | NA            | 0.007701235 | 2.63635782   | Up   | -1.0241 | -0.8506 | -0.4916 | -0.5245 |
| A_24_P867702 | NA            | 0.007701235 | 2.904534797  | Up   | -0.3356 | -0.3537 | 0.0189  | 0.1995  |
| A_24_P42308  | NA            | 0.007701235 | 4.748154355  | Up   | -0.4075 | -0.1231 | 0.4163  | 0.4512  |
| A_23_P93543  | PEX7          | 0.007701235 | 2.041962388  | Up   | -0.2463 | -0.1184 | 0.1235  | 0.1411  |
| A_23_P159877 | RAB39B        | 0.007701235 | 3.371120933  | Up   | 0.2658  | 0.1795  | 0.6436  | 0.8396  |
| A_23_P40952  | RAF1          | 0.007701235 | 3.24510453   | Up   | 0       | 0       | 0.5997  | 0.4     |
| A_23_P436476 | RBM34         | 0.007701235 | 2.629942204  | Up   | 0       | 0       | 0.4966  | 0.3268  |
| A_23_P321959 | SFT2D1        | 0.007701235 | 2.93596275   | Up   | -0.8281 | -0.9573 | -0.3562 | -0.4952 |
| A_24_P175435 | SLC2A8        | 0.007701235 | 2.267477893  | Up   | 0       | -0.1112 | 0.2534  | 0.3484  |
| A_23_P412962 | TBX19         | 0.007701235 | 2.834253951  | Up   | -0.1755 | -0.3337 | 0.1543  | 0.2504  |
| A_23_P212968 | UGT2B11       | 0.007701235 | 2.292935034  | Up   | -1.2833 | -1.3725 | -0.9123 | -1.0255 |
| A_23_P44643  | ANAPC7        | 0.007780919 | 3.918480897  | Up   | -0.0357 | -0.2734 | 0.4951  | 0.41    |
| A_23_P34031  | CTD-2267G17.3 | 0.007781568 | 2.237362357  | Up   | 0.134   | 0.0066  | 0.4603  | 0.3859  |
| A_32_P66091  | KSR1          | 0.007781568 | -2.852053049 | Down | 0.7876  | 0.8207  | 0.2426  | 0.4349  |
| A_23_P86434  | MGC14425      | 0.007781568 | -2.640918705 | Down | 0.6947  | 0.5786  | 0.2807  | 0.1465  |
| A_23_P137046 | NYX           | 0.007781568 | -4.371575139 | Down | 0.2074  | 0.0379  | -0.4178 | -0.6266 |
| A_24_P245322 | PRKAR1A       | 0.007781568 | 2.722803951  | Up   | 0       | 0       | 0.3369  | 0.515   |
| A_23_P421664 | CAP2          | 0.007839354 | 4.284620953  | Up   | -0.1274 | 0.0548  | 0.6926  | 0.4954  |
| A_23_P46781  | ITGA8         | 0.007839354 | -2.855758205 | Down | -0.1922 | -0.13   | -0.7195 | -0.532  |
| A_32_P97305  | NA            | 0.007839354 | -3.755551771 | Down | -0.6578 | -0.7206 | -1.4014 | -1.1578 |
| A_24_P928557 | NA            | 0.007839354 | 2.172031428  | Up   | -0.9344 | -1.0788 | -0.655  | -0.6727 |
| A_23_P213508 | PCSK1         | 0.007839354 | -4.79057484  | Down | 0.8975  | 0.6293  | 0.0609  | 0.1421  |
| A_23_P95879  | RPL38         | 0.007839354 | -2.342621845 | Down | -0.3231 | -0.2061 | -0.6852 | -0.5817 |
| A_24_P338757 | USPL1         | 0.007839354 | -2.45845796  | Down | 0.6226  | 0.506   | 0.2325  | 0.1146  |
| A_23_P416169 | ALKBH5        | 0.007900763 | 2.751093811  | Up   | -0.6519 | -0.843  | -0.2851 | -0.3103 |
| A_23_P122067 | C1QTNF3       | 0.00791921  | 2.789250511  | Up   | 0.159   | 0.2447  | 0.5566  | 0.7259  |

|              |          |             |              |      |         |         |         |         |
|--------------|----------|-------------|--------------|------|---------|---------|---------|---------|
| A_24_P911571 | GNB5     | 0.00791921  | -2.97260972  | Down | 0.1292  | 0.0132  | -0.3211 | -0.4917 |
| A_23_P370054 | MAGEB18  | 0.00791921  | 3.429821901  | Up   | 0       | -0.1597 | 0.538   | 0.3716  |
| A_23_P110031 | ZNF589   | 0.00791921  | -2.230518788 | Down | 0.3084  | 0.2557  | -0.1428 | 0       |
| A_23_P135589 | NA       | 0.007979862 | -3.742593764 | Down | 0.6268  | 0.4018  | 0       | -0.094  |
| A_32_P126259 | NA       | 0.007987461 | 2.535236704  | Up   | -0.458  | -0.4896 | -0.1627 | 0.0072  |
| A_24_P576506 | SPRN     | 0.007987461 | -2.089841893 | Down | 0.1038  | -0.0296 | -0.2954 | -0.2611 |
| A_23_P117464 | TPPP2    | 0.007987461 | 2.589206091  | Up   | -0.1974 | -0.0138 | 0.3263  | 0.3079  |
| A_23_P70213  | APC      | 0.008002396 | 3.952866344  | Up   | -0.352  | -0.5674 | 0.0657  | 0.2213  |
| A_23_P320658 | BUB3     | 0.008002396 | -2.074355777 | Down | -0.8677 | -0.926  | -1.1529 | -1.2822 |
| A_23_P112846 | MTHFD2L  | 0.008002396 | 3.62750544   | Up   | -0.0696 | -0.0911 | 0.3434  | 0.5828  |
| A_32_P47474  | NA       | 0.008002396 | -2.589571281 | Down | 0.4142  | 0.5527  | 0.1312  | 0.0121  |
| A_24_P465306 | NA       | 0.008002396 | -2.355899339 | Down | -0.4724 | -0.3507 | -0.7278 | -0.8381 |
| A_24_P887695 | NA       | 0.008002396 | 2.439875434  | Up   | -0.3894 | -0.4573 | -0.1188 | 0.0358  |
| A_23_P27515  | PLD3     | 0.008002396 | 2.045317826  | Up   | -0.6293 | -0.5242 | -0.2201 | -0.3102 |
| A_23_P128174 | RAB3IP   | 0.008002396 | -2.109613164 | Down | 0.0429  | -0.0761 | -0.3004 | -0.3764 |
| A_24_P295010 | SERPINB9 | 0.008002396 | 2.808596702  | Up   | -0.0469 | 0.0233  | 0.5198  | 0.3374  |
| A_23_P345093 | SLC36A4  | 0.008002396 | -2.354400878 | Down | -0.1382 | -0.1358 | -0.4336 | -0.6    |
| A_24_P102981 | DNAJB2   | 0.008004468 | 5.501955574  | Up   | -0.5379 | -0.5194 | 0.342   | 0.0255  |
| A_24_P928068 | TAF15    | 0.008004817 | -2.572758286 | Down | -1.0232 | -1.1839 | -1.5496 | -1.4674 |
| A_32_P422453 | FAM21C   | 0.008033576 | 3.438384776  | Up   | -0.1866 | -0.2913 | 0.1823  | 0.3934  |
| A_32_P2442   | CYP20A1  | 0.008037353 | 2.65768678   | Up   | -0.4678 | -0.5425 | -0.1741 | -0.0011 |
| A_24_P404458 | ITGB1BP3 | 0.008037353 | -5.062454025 | Down | 0.7751  | 0.4845  | 0       | -0.1081 |
| A_23_P64051  | NA       | 0.008037353 | -5.038886887 | Down | 0.895   | 0.9044  | 0       | 0.3326  |
| A_24_P144332 | NA       | 0.008037353 | -3.197386707 | Down | 0.2651  | 0.1314  | -0.404  | -0.2185 |
| A_24_P911648 | NA       | 0.008037353 | 2.992592134  | Up   | 0       | 0       | 0.5684  | 0.3586  |
| A_23_P336034 | OXER1    | 0.008037353 | 3.28613715   | Up   | -0.1541 | -0.0933 | 0.4897  | 0.2712  |
| A_23_P69068  | PLXNA1   | 0.008037353 | 2.082544883  | Up   | -0.8194 | -0.9468 | -0.5968 | -0.5258 |
| A_23_P251387 | REPS2    | 0.008037353 | -2.608150876 | Down | 0.0622  | 0.0032  | -0.3007 | -0.4837 |
| A_32_P30710  | RPL23    | 0.008037353 | -2.887515215 | Down | 0.5246  | 0.6085  | 0       | 0.1945  |
| A_24_P901135 | NA       | 0.008041986 | 2.520667996  | Up   | -1.4504 | -1.6374 | -1.1306 | -1.1342 |
| A_23_P124632 | IGHA1    | 0.008072066 | 4.746024082  | Up   | -0.0418 | -0.3463 | 0.4559  | 0.5553  |
| A_23_P72096  | IL1A     | 0.008072066 | 2.97489424   | Up   | -1.0244 | -1.1024 | -0.5006 | -0.698  |
| A_23_P89646  | KRTAP9-2 | 0.008072066 | 2.502299551  | Up   | 0.1074  | -0.0706 | 0.4528  | 0.397   |
| A_24_P238819 | NA       | 0.008072066 | 2.020816175  | Up   | -1.0375 | -1.1005 | -0.8284 | -0.705  |
| A_24_P106953 | PTGES2   | 0.008072066 | -2.235883714 | Down | 0.1789  | 0.3339  | -0.0969 | -0.0757 |
| A_24_P84482  | NA       | 0.008086978 | 3.36310618   | Up   | -0.1012 | 0       | 0.5736  | 0.3581  |
| A_23_P329198 | OBFC2A   | 0.008086978 | 2.640985431  | Up   | -0.545  | -0.363  | -0.0633 | 0.0143  |
| A_24_P214231 | STIL     | 0.008086978 | -3.731530417 | Down | -0.0077 | -0.052  | -0.487  | -0.7565 |
| A_23_P101007 | NOTUM    | 0.008095402 | -3.432023033 | Down | -0.3633 | -0.5247 | -0.8876 | -1.0771 |
| A_24_P932810 | NA       | 0.008145068 | 2.851912703  | Up   | -0.968  | -1.0087 | -0.4433 | -0.6455 |
